# Supplementary material for: Critical success factors for the implementation and adoption of e-learning for junior health care workers in Dadaab refugee camp Kenya
Source: Springer Nature journal article supplement (doi:10.1186/s12960-019-0435-8), 2019-12-01
Supplement: MOESM1 [file 17486886]

Additional files

a) Academic performance

**Results cohort 1**

| Student      | Exa 1      | Exa 2      | Total written | Oral       | Overall    | Diploma     |
|--------------|------------|------------|---------------|------------|------------|-------------|
| S01          | 37%        | 42%        | 39%           | 77%        | 58%        | attestation |
| S02          | 50%        | 31%        | 42%           |            |            |             |
| S03          | 30%        | 50%        | 38%           | 42%        | 40%        | attestation |
| S04          | 41%        | 58%        | 48%           | 38%        | 43%        | attestation |
| S05          | 15%        | 50%        | 29%           | 45%        | 37%        | attestation |
| S06          | 20%        | 39%        | 28%           | 52%        | 40%        | attestation |
| S07          | 37%        | 39%        | 38%           | 52%        | 45%        | attestation |
| S08          | 24%        | 33%        | 28%           | 47%        | 37%        | attestation |
| S09          | 11%        | 75%        | 37%           | 38%        | 38%        | attestation |
| S10          | 9%         | 42%        | 22%           | 62%        | 42%        | attestation |
| S11          | 41%        |            |               |            |            |             |
| S12          | 11%        | 8%         | 10%           |            |            |             |
| S13          | 0%         | 0%         | 0%            | 30%        | 15%        | certificate |
| S14          | 7%         | 8%         | 8%            | 39%        | 24%        | certificate |
| S15          |            |            |               |            |            |             |
| S16          |            |            |               |            |            |             |
| S17          |            |            |               |            |            |             |
| <b>Total</b> | <b>24%</b> | <b>37%</b> | <b>28%</b>    | <b>47%</b> | <b>38%</b> |             |

**Results cohort 2**

| Student      | Exa 1      | Exa 2      | Total written | Oral       | Overall    | Diploma     |
|--------------|------------|------------|---------------|------------|------------|-------------|
| S21          | 56%        | 56%        | 56%           | 79%        | 67%        | attestation |
| S22          | 48%        | 31%        | 41%           | 50%        | 46%        | attestation |
| S23          | 7%         | 6%         | 7%            | 43%        | 25%        | certificate |
| S24          | 17%        | 28%        | 21%           | 42%        | 31%        | certificate |
| S25          | 39%        |            |               |            |            |             |
| S26          | 54%        | 47%        | 51%           |            |            |             |
| S27          | 28%        | 25%        | 27%           | 53%        | 40%        | attestation |
| S28          | 43%        | 56%        | 48%           | 93%        | 70%        | attestation |
| S29          | 41%        | 19%        | 32%           | 40%        | 36%        | attestation |
| <b>Total</b> | <b>37%</b> | <b>34%</b> | <b>35%</b>    | <b>57%</b> | <b>45%</b> |             |

*B) Results of profile correlation*

**Comparison of the overall scores of two groups: students with practical experience (group1) and students with no experience (group2)**

Méthode : Welch Two Sample t-test; Alternative :two.sided  
Qobs : 1.0036413411336  
p-value : 0.33667551242336  
T : Array IC at 95%[-7.9724 ; 21.401]  
Degree of liberty: 11.236449805607  
Mean: Group 1: 47.857142857143 ; Group 2: 41.142857142857

**Comparison of the oral scores of two groups: students with practical experience (group 1) and students with no experience (group2)**

Method : Welch Two Sample t-test; Alternative :two.sided  
Qobs : 0.97712770648394  
p-value : 0.34944814333351  
T : Array Intervalle de confiance à 95%[-11.4444 ; 29.7301]  
Degree of liberty : 11.031214534765  
Mean : Group 1: 58.428571428571 ; Group2: 49.285714285714

**Comparison of two groups: with motivation towards clinical practice (group 1) and without (group 2)**

Méthode : Welch Two Sample t-test; Alternative :two.sided  
Qobs : 2.0081220225098  
p-value : 0.10321537714509  
T : Array IC at 95%[-4.3745 ; 33.9301]  
Degree of liberty : 4.8033199924694  
Mean: Group 1: 54 ; Group 2: 39.222222222222

**Comparison of the scores of two groups : women (group 1) and men (group 2)**

Method : Welch Two Sample t-test; Alternative :two.sided  
Qobs : -0.85265805271521  
p-value : 0.40745194036  
T : Array Intervalle de confiance à 95%[-16.3831 ; 7.0293]  
Degree of liberty : 14.782743122537  
Mean : Group 1 : 37.4 Group 2 : 42

**Comparison of two groups : without content on cell phone (group 1) and with cell phone (group 2)**

Méthode : Welch Two Sample t-test; Alternative :two.sided  
Qobs : -0.97810157690588  
p-value : 0.34747179058998  
T : Array Intervalle de confiance à 95%[-20.7222 ; 7.8888]  
Degree of liberty: 11.911524536676  
Mean: Group 1: 40.8333333333333 ; Group 2: 47.25
